# Supplementary material for: Anti-Biofilm Properties of Laser-Synthesized, Ultrapure Silver-Gold-Alloy Nanoparticles against Staphylococcus aureus
Source: Research Square preprint supplement (doi:10.21203/rs.3.rs-3337662/v1), 2023-12-12
Supplement: Supplementary file 1 [file 6a1a7024c51007d13f7ca258.docx]

**Supplementary Information**

**Anti-Biofilm Properties of Laser-Synthesized, Ultrapure Silver-Gold-Alloy Nanoparticles against *Staphylococcus aureus***

Nils Heine1,2*, Katharina Doll-Nikutta1,2, Frederic Stein3, Jurij Jakobi3, Alexandra Ingendoh-Tsakmakidis1,2, Christoph Rehbock3, Andreas Winkel1,2, Stephan Barcikowski3, Meike Stiesch1,2*

1Department of Prosthetic Dentistry and Biomedical Materials Science, Hannover Medical School, Carl-Neuberg-Straße 1, 30625 Hannover, Germany

2Lower Saxony Centre of Biomedical Engineering, Implant Research and Development, Stadtfelddamm 34, 30625 Hannover, Germany

3Technical Chemistry I, University of Duisburg Essen, Universitaetsstr. 7, 45141 Essen, Germany

*Corresponding author: [meike.stiesch@mh-hannover.de](mailto:meike.stiesch@mh-hannover.de), [heine.nils@mh-hannover.de](mailto:heine.nils@mh-hannover.de)


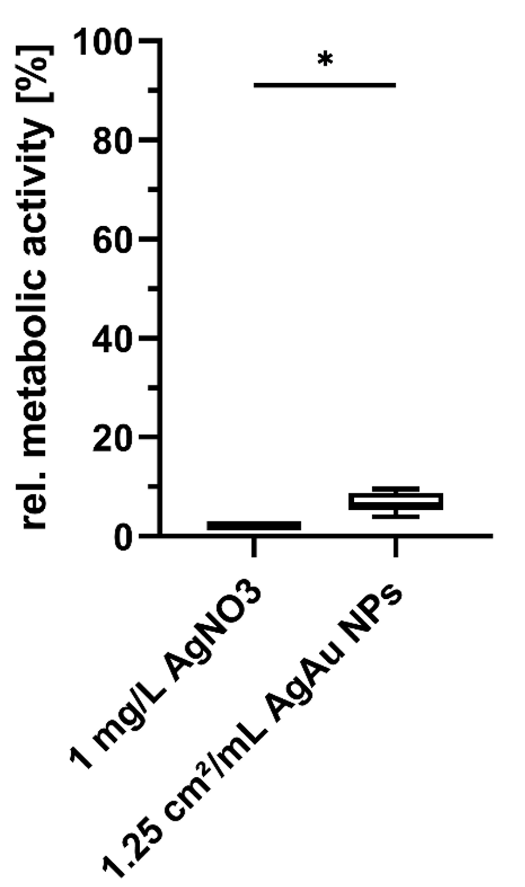


Supplementary Figure 1: Relative metabolic activity of planktonic S. aureus treated with AgNO3 or nanoparticles consisting of 80 mol% silver and 20 mol% gold in binding buffer. Statistically significant difference with p ≤ 0.05 is indicated by (*) and was determined by an unpaired t test.

| Primer | Sequence (5’ to 3’) |
| --- | --- |
| *rrsA* forward | GCCCCTTAGTGCTGCAGCTA |
| *rrsA* reverse | AGTTTCAACCTTGCGGTCGTA |
| *pfkA* forward | GTCCAGAGTTTAAGGAGCAAGA |
| *pfkA* reverse | ACTACCGTCACCACCAATAAC |
| *ahpD* forward | GTCTGTAATGAGCCAAGGTGAA |
| *ahpD* reverse | GGATATCAACACAATAATGACAACCG |
| *icaR* forward | TCGAACTATTCAATTGATGCTTTA |
| *icaR* reverse | CAGAAAATTCCTCAGGCGTA |

Supplementary Table 1: Primers for qRT-PCR.

| Gene | Temperature [°C] | Elongation Time [s] | Number of cycles |
| --- | --- | --- | --- |
| *rrsA* | 60 | 30 | 40 |
| *pfkA* | 60 | 30 | 40 |
| *ahpD* | 63 | 30 | 40 |
| *icaR* | 55 | 30 | 40 |

Supplementary Table 2: qRT-PCR annealing temperatures, elongation times, and number of cycles for each gene.
